# Supplementary material
Source: PubMed Central journal article supplement (PMC7012463)
Supplement: 2019_219048-Disclosures_and_Contributions.pdf [file 2019_219048-Disclosures_and_Contributions.pdf]

Haematologica  
HAEMATOL/2019/219048  
Version 3

Characterization of the phenotype of human eosinophils and their progenitors in the bone marrow of healthy individuals

Marwan Hassani, Selma van Staveren, Erinke van Grinsven, Marije Bartels, Kiki Tesselaar, Guus Leijte, Mathijs Kox, Peter Pickkers, Nienke Vrisekoop, and Leo Koenderman

Disclosures: None

Contributions: MH designed and performed experiments with the help of SvS, EvG and KT. NV, MB and LK supervised experimental design and data analysis. MH wrote manuscript. LK helped draft and revise the manuscript. SvS, EvG, MB, KT, GL, MK and NV revised the manuscript. MK, PP and GL were involved in designing the study and carrying out the bone marrow aspirates. All authors read and approved the final manuscript.
